# Supplementary material for: Fluorescein dye intercalated layered double hydroxides for chemically stabilized photoluminescent indicators on inorganic surfaces
Source: Royal Society of Chemistry journal article supplement (doi:10.1039/c4dt00692e), 2014-01-01
Supplement: c4dt00692e1.pdf [file c4dt00692e1.pdf]

## Electronic Supplementary Information (ESI)

### Fluorescein Dyes Intercalated Layered Double Hydroxides for Chemically Stabilized Photoluminescent Indicators on Inorganic Surfaces

*Jong Hyeon Lee<sup>a</sup>, Duk-Young Jung<sup>\*b</sup>, Eunchul Kim<sup>c</sup>, Tae Kyu Ahn<sup>c</sup>*

<sup>a</sup> Department of Chemistry, The Catholic University of Korea, Bucheon, Gyeonggi 420-743, Korea

<sup>b</sup> Department of Chemistry, Sungkyunkwan Advanced Institute of Nanotechnology, Institute of Basic Sciences, Sungkyunkwan University, Suwon 440-746, Korea  
Fax: +82-31-290-7075, E-mail: dyjung@skku.edu

<sup>c</sup> Department of Energy Science, Sungkyunkwan University, Suwon 440-746, Korea

[Table S1] Fluorescence Property of fluorescein dyes intercalated LDH film (LDH-F film)

| Particle number | A <sub>1</sub> | τ <sub>1</sub> (ns) | A <sub>2</sub> | τ <sub>2</sub> (ns) | A <sub>3</sub> | τ <sub>3</sub> (ns) | τ <sub>ave.int</sub> (ns) |
|-----------------|----------------|---------------------|----------------|---------------------|----------------|---------------------|---------------------------|
| 1               | 75.79          | 0.23                | 21.87          | 1.15                | 2.34           | 4.17                | <b>1.41</b>               |
| 2               | 83.04          | 0.21                | 15.16          | 1.26                | 1.80           | 4.72                | <b>1.49</b>               |
| 3               | 81.24          | 0.20                | 17.42          | 1.07                | 1.34           | 4.56                | <b>1.24</b>               |
| 4               | 81.27          | 0.22                | 16.91          | 1.20                | 1.82           | 4.82                | <b>1.50</b>               |
| 5               | 80.73          | 0.20                | 17.66          | 1.25                | 1.61           | 5.23                | <b>1.60</b>               |

where A<sub>i</sub> and τ<sub>i</sub> are amplitude ratio and lifetime of each component, respectively. Intensity w

eighted average lifetime was given by  $\tau_{ave.int} = \frac{\sum_i A_i \tau_i^2}{\sum_i A_i \tau_i}$ .
